# Supplementary material
Source: publisher figshare collection journal article supplement (https://acs.figshare.com/ndownloader/files/4413001)

Supporting Figure 1. 1DE to demonstrate efficiency of immunodepletion of monkey samples on human column.

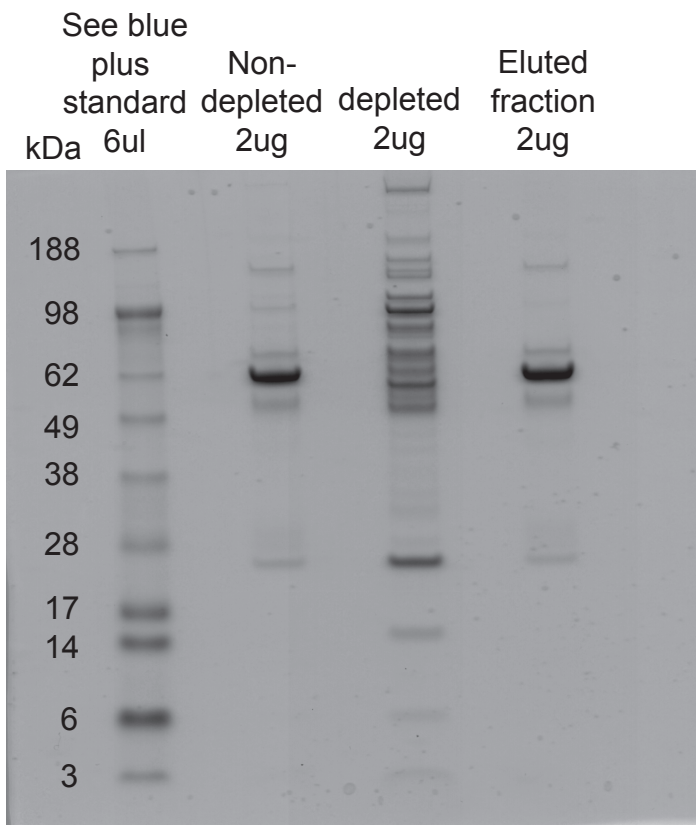

Supplement: Supplementary file 1 [file 4413001]
